# Supplementary material for: Butyrate Emerges as a Crucial Effector of Zhi-Zi-Chi Decoctions to Ameliorate Depression via Multiple Pathways of Brain-gut Axis
Source: Research Square preprint supplement (doi:10.21203/rs.3.rs-1212989/v1), 2022-01-07
Supplement: Supplementary file 3 [file 34d1559a0b2c03c9b778c4a2.docx]

Table S1 Results of α diversity in each group (n=6) (Mean±SEM)

| Groups | Shannon_e | Simpson | Chao1 | Richness |
| --- | --- | --- | --- | --- |
| Ct | 3.12±0.28 | 0.15±0.04 | 190.87±9.26 | 187.17±9.14 |
| CUMS | 3.63±0.05 | 0.08±0.01 | 199.48±2.84 | 198.33±2.70 |
| FLU | 3.11±0.20 | 0.14±0.03 | 188.73±5.66 | 186.67±6.59 |
| ZZCD | 3.71±0.14 | 0.06±0.01 | 206.45±2.02 | 198.33±3.15 |
