# Supplementary material for: Butyrate Emerges as a Crucial Effector of Zhi-Zi-Chi Decoctions to Ameliorate Depression via Multiple Pathways of Brain-gut Axis
Source: Research Square preprint supplement (doi:10.21203/rs.3.rs-1212989/v1), 2022-01-07
Supplement: Supplementary file 4 [file d13370b2196e424b916d4f05.docx]

Table S2 The relative abundance of microbiota in caecum contents between four groups at main genus level (n=6) (Mean±SEM)

| Genus | Relative abundance(%) | | | |
| --- | --- | --- | --- | --- |
| Ct | CUMS | FLU | ZZCD |
| Clostridium_XlVa | 7.56±2.46 | 18.96±5.4 | 6.32±1.03 | 11.24±2.33 |
| Lactobacillus | 45.02±17.01 | 19.82±13.88 | 47.13±19.15 | 34.53±13.68 |
| Ruminococcus | 1.03±0.9 | 0.52±0.54 | 1.28±1.01 | 0.69±0.7 |
| Clostridium_IV | 1.1±0.75 | 1.21±0.9 | 1.57±0.92 | 1.36±0.74 |
| Saccharibacteria_genera_incertae_sedis | 0.81±0.58 | 0.37±0.31 | 0.54±0.26 | 1.97±0.51 |
| Eubacterium | 1.05±1.02 | 0.9±0.97 | 1.2±1.03 | 0.57±0.48 |
| Bacteroides | 0.56±0.39 | 1.04±0.59 | 0.39±0.36 | 0.68±0.59 |
| Alistipes | 0.39±0.23 | 0.84±0.32 | 0.53±0.39 | 0.53±0.38 |
| Intestinimonas | 0.42±0.39 | 0.82±0.49 | 0.3±0.21 | 0.47±0.17 |
| Romboutsia | 9.31±6.08 | 1.89±0.9 | 5.41±6.44 | 3.36±1.43 |
| Streptococcus | 1.77±2.41 | 0.26±0.12 | 0.6±0.69 | 0.11±0.06 |
| Oligella | 0.52±0.39 | 5.55±4.25 | 0.04±0.03 | 1.16±1.29 |
| Anaeroplasma | 0.15±0.18 | 0.23±0.35 | 0.09±0.14 | 0.03±0.03 |
| Turicibacter | 0.51±0.39 | 0.46±0.58 | 0.44±0.59 | 0.38±0.3 |
| Psychrobacter | 0.13±0.15 | 2.48±2.65 | 0.03±0.03 | 0.41±0.41 |
| Corynebacterium | 0.2±0.14 | 0.31±0.15 | 0.03±0.02 | 0.19±0.13 |
